# Supplementary material for: Regulation of Noise-Induced Loss of Serotonin Transporters with Resveratrol in a Rat Model Using 4-[18F]-ADAM/Small-Animal Positron Emission Tomography
Source: PubMed Central journal article supplement (PMC6480549; doi:10.3390/molecules24071344), 2019-04-05
Supplement: molecules-24-01344-s001.pdf [file molecules-24-01344-s001.pdf]

# Regulation of Noise-Induced Loss of Serotonin Transporters with Resveratrol in a Rat Model Using 4-[<sup>18</sup>F]-ADAM/Small-Animal Positron Emission Tomography

I-Hsun Li <sup>1,2</sup>, Jui-Hu Shih <sup>1,2</sup>, Yun-Tin Jhao <sup>3</sup>, Hsin-Chien Chen <sup>4</sup>, Chuang-Hsin Chiu <sup>5</sup>, Chien-Fu F. Chen <sup>6</sup>, Yuahn-Sieh Huang <sup>3</sup>, Chyng-Yann Shiue <sup>5</sup> and Kuo-Hsing Ma <sup>3,\*</sup>

<sup>1</sup> Department of Pharmacy Practice, Tri-Service General Hospital, Taipei, Taiwan; lhs01077@gmail.com (I.-H.L.); jtlovehl@gmail.com (J.-H.S.)

<sup>2</sup> School of Pharmacy, National Defense Medical Center, Taipei, Taiwan

<sup>3</sup> Department of Biology and Anatomy, National Defense Medical Center, Taipei, Taiwan; ytcola581470@gmail.com (Y.-T.J.); anatomian2001@yahoo.com.tw (Y.-S.H.)

<sup>4</sup> Department of Otorhinolaryngology-Head and Neck Surgery, Tri-Service General Hospital, National Defense Medical Center, Taipei, Taiwan; acolufreia@yahoo.com.tw

<sup>5</sup> Department of Nuclear Medicine, Tri-Service General Hospital, National Defense Medical Center, Taipei, Taiwan; treasure316@gmail.com (Y.-S.H.); shiue@ntuh.gov.tw (C.-Y.S.)

<sup>6</sup> Graduate Institute of Life Sciences, National Defense Medical Center, Taipei, Taiwan; t70cyy@yahoo.com

\* Correspondence: kuohsing91@yahoo.com.tw; Fax: +886-2-87923159

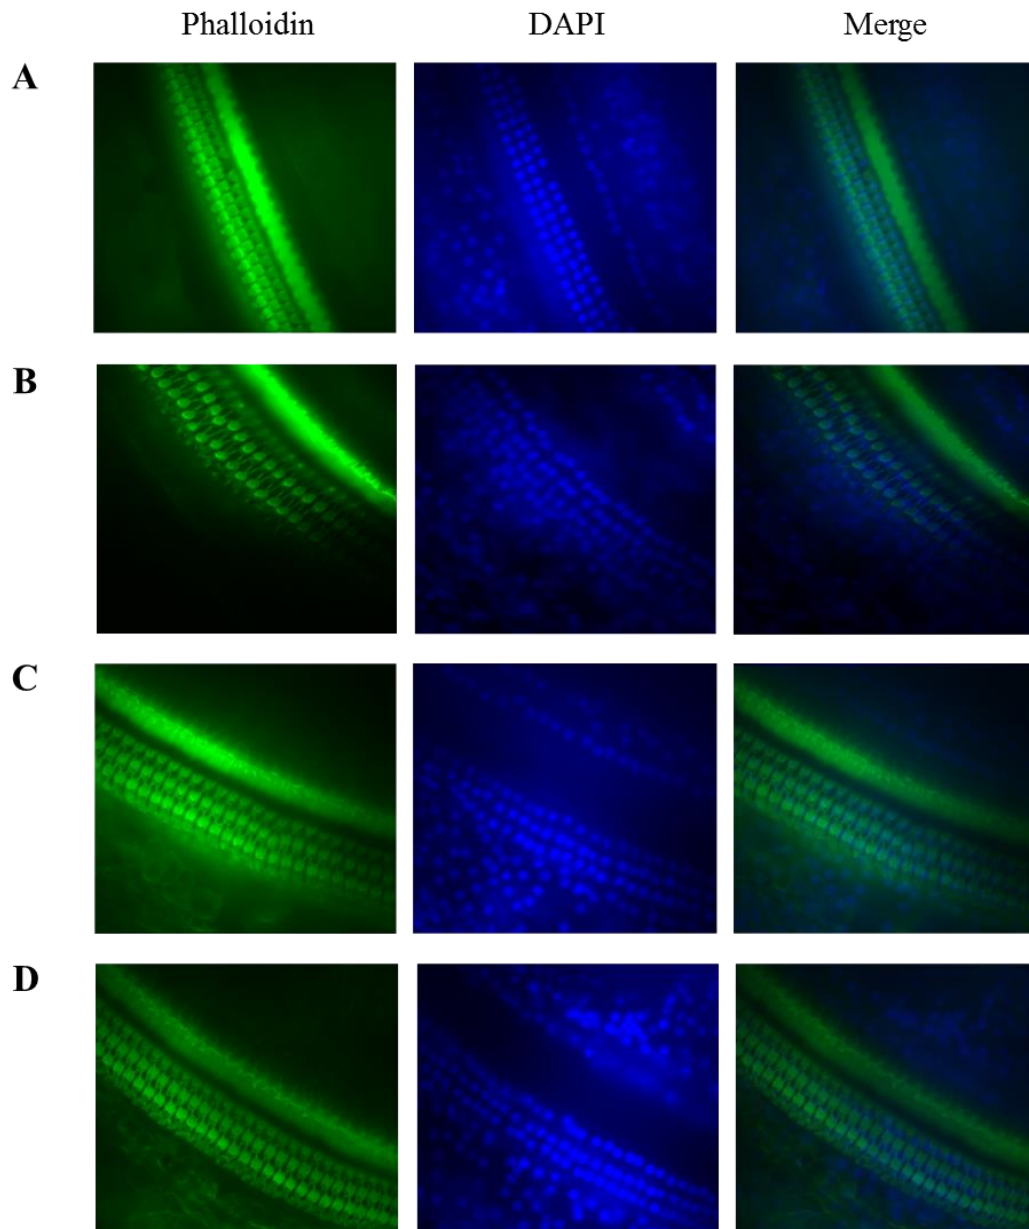

**Supplementary Figure S1.** The photos depict the effect of noise exposure and drug protection on outer hair cell survival. No substantial losses of outer hair cells were noted following noise exposure for 4 weeks. (A) control group; (B) noise exposure group; (C) resveratrol-treated group; (D) citalopram-treated group.

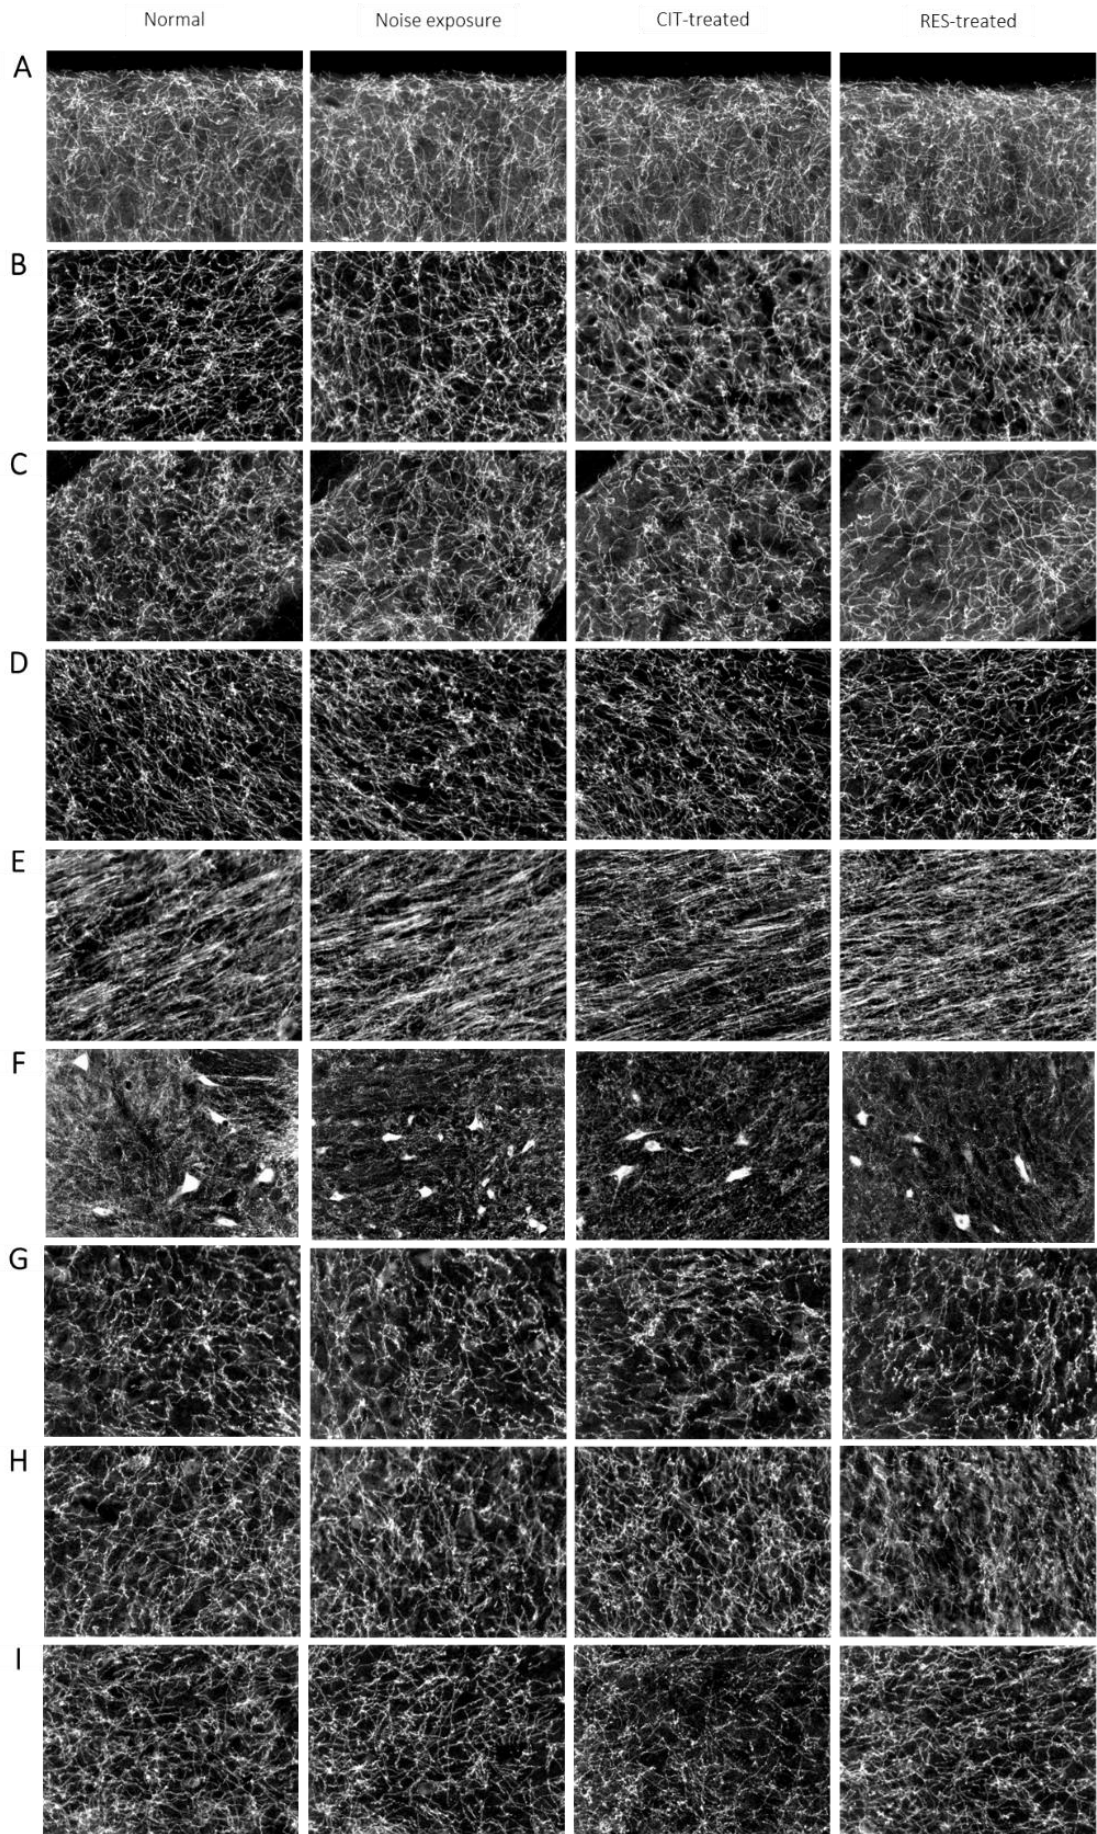

**Supplementary Figure S2.** Photomicrographs of serotonin transporters by immunohistochemistry stain in various brain regions of the control group, noise exposure group, citalopram-treated group, and resveratrol-treated group are displayed. The serotonergic fibre densities in various brain regions were not different among the groups. (A) frontal cortex; (B) auditory cortex; (C) striatum; (D) thalamus; (E) hypothalamus; (F) raphe nucleus; (G) cochlear nucleus; (H) inferior colliculus; and (I) hippocampus.

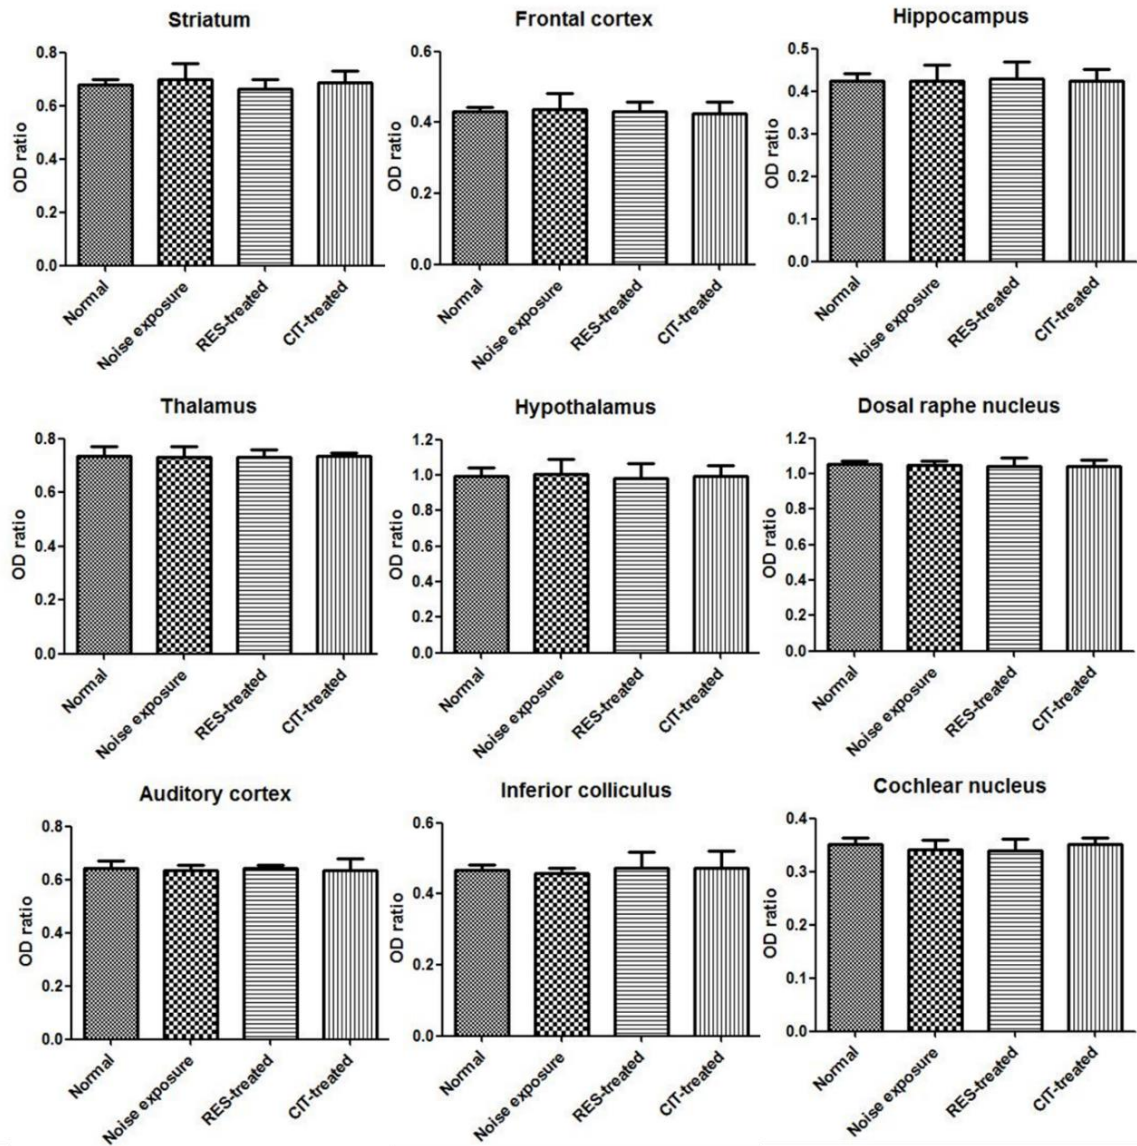

**Supplementary Figure S3.** The graphs display optical density (OD) ratios in various brain regions at 4 weeks after noise exposure. The OD ratios in various brain regions were not different among the control group, noise exposure group, and drug-treated groups at 4 weeks after noise exposure.
